# Supplementary material
Source: PubMed Central journal article supplement (PMC4318532)

## **Large-scale Brain Networks of the Human Left Temporal Pole: A Functional Connectivity MRI Study**

Belen Pascual<sup>1</sup>, Joseph C. Masdeu<sup>2</sup>, Mark Hollenbeck<sup>1</sup>, Nikos Makris<sup>3,4</sup>, Ricardo Insausti<sup>5</sup>, Song-Lin Ding<sup>6</sup>, and Bradford C. Dickerson<sup>1,3,4</sup>

<sup>1</sup> MGH Frontotemporal Dementia Unit, Department of Neurology, Martinos Center for Biomedical Imaging, Massachusetts General Hospital and Harvard Medical School, Charlestown, MA, USA

<sup>2</sup> Section on Integrative Neuroimaging, National Institutes of Health, Bethesda, MD, USA

<sup>3</sup> Center for Morphometric Analysis, Department of Neurology, Massachusetts General Hospital and Harvard Medical School, Charlestown, MA, USA

<sup>4</sup> Center for Neural Systems Investigation, Departments of Neurology, Massachusetts General Hospital and Harvard Medical School, Charlestown, MA, USA

<sup>5</sup> Center for Human Neuroanatomy Laboratory, Department of Health Sciences, School of Medicine, University of Castilla-La Mancha, Albacete, Spain

<sup>6</sup> Allen Institute for Brain Science, Seattle, WA

[Supplementary Table 1](#)

[Supplementary Table 2 \(Excel file\)](#)

[Supplementary Figure 1](#)

[Supplementary Figure 2](#)

[Supplementary Figure 3](#)

[Supplementary Figure 4](#)

[Supplementary Figure 5](#)

[Supplementary Figure 6](#)

**Supplementary Table S1.** MRI Parameters

| <b>Sequence</b>                                                 | <b>Parameters</b>                  | <b>Sample 1</b> | <b>Sample 2</b> | <b>Sample 3</b> |
|-----------------------------------------------------------------|------------------------------------|-----------------|-----------------|-----------------|
| <b>RS-fMRI. T2*-weighted gradient-echo echo-planar sequence</b> |                                    |                 |                 |                 |
|                                                                 | No. of interleaved coronal slices  | 47              | 55              | 33              |
|                                                                 | TR (ms)                            | 3000            | 5000            | 2000            |
|                                                                 | TE (ms)                            | 30              | 30              | 30              |
|                                                                 | FA                                 | 85°             | 90°             | 90°             |
|                                                                 | Matrix                             | 72x72           | 128x112         | 64x64           |
|                                                                 | FOV (mm)                           | 216             | 256             | 200             |
|                                                                 | Voxel size (mm)                    | 3.0 isotropic   | 2.0 isotropic   | 3.1x3.1x6       |
|                                                                 | Acquisitions per run               | 124             | 76              | 128             |
| <b>MPRAGE sequence</b>                                          |                                    |                 |                 |                 |
|                                                                 | No. of interleaved sagittal slices | 144             | 192             | 176             |
|                                                                 | TR (ms)                            | 2200            | 2300            | 2530            |
|                                                                 | TE (ms)                            | 1.54            | 2.98            | 3.45            |
|                                                                 | FA                                 | 7°              | 7°              | 7°              |
|                                                                 | Matrix                             | 192x192         | 240x256         | 256x256         |
|                                                                 | FOV (mm)                           | 230             | 256             | 256             |
|                                                                 | Voxel size (mm)                    | 1.2 isotropic   | 1.0 isotropic   | 1.0 isotropic   |

**FA:** Flip Angle. **FOV:** Field of View. **MPRAGE:** Magnetization-Prepared Rapid Acquisition with Gradient Echo. **RS-fMRI:** Resting State Functional Magnetic Resonance Image. **TE:** Echo Time. **TR:** Repetition Time.

**Supplementary Figure S1.** Temporal signal-to-noise ratio (TSNR) maps of the functional data from the full sample (N = 172). Please note that the TSNR at all areas of the temporal pole exceeds the ratio of 40 considered to be the minimum to reliably detect effects between conditions in fMRI data (Murphy K et al. 2007).

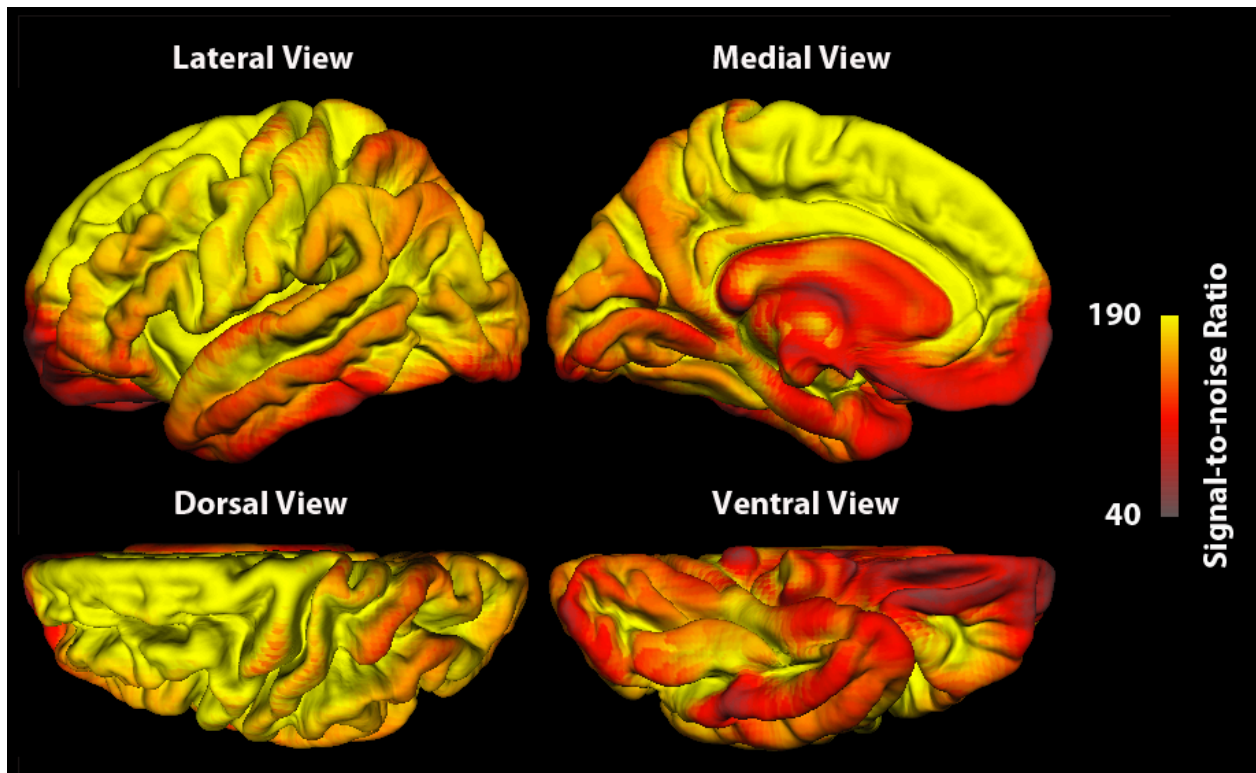

**Supplementary Figure S2.** Location of the semicircular notch on the dorso-medial aspect of the human TP, on coronal sections (A), surface anatomy (B) and orthogonal T1-weighted sections (C) of the standard MNI152 27 template brain (arrows). Figures are reproduced or modified from Ding et al. (2009) and Blaizot X et al. (2010) –see main text references– with permission.

## Semicircular Temporal Notch

### A

#### Coronal Images

We define this previously undescribed shallow notch (arrow) in order to provide a medial boundary for TAr at this coronal level of the temporal pole (see text):

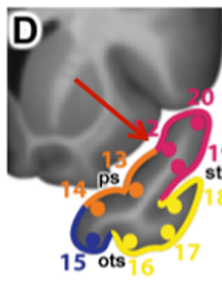

A similar shallow notch, or cortical inflexion, can be seen at the same coronal level in:

From Fig 1

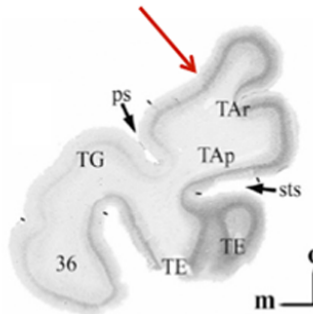

Fig 2 of Ding et al. (2009). The change of cortical configuration at this level is quite clear

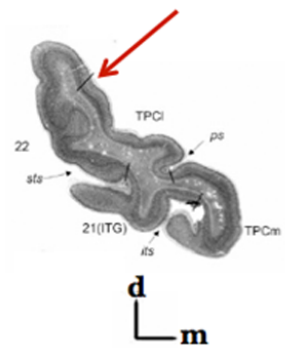

Fig 4 of Blaizot X et al.(2010)

### B

#### Dorsomedial Surface Appearance

On this surface, TAr and TG are raised, like a ridge, creating a shallow semicircular notch caudo-medial to TAr and TG

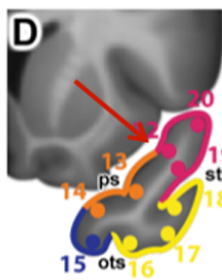

Arrows point to the shallow semicircular temporal notch

Semicircular notch or cortical inflexion at the TAr boundary

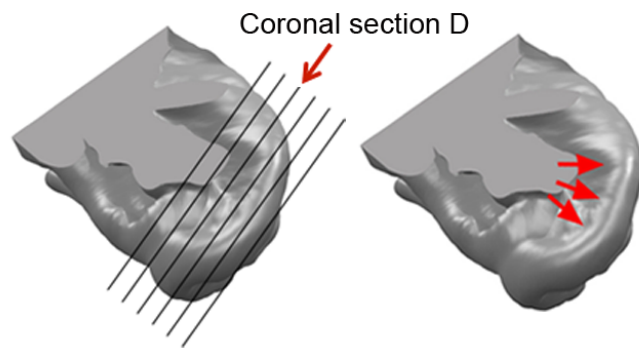

Fig 1 of Ding et al. (2009)

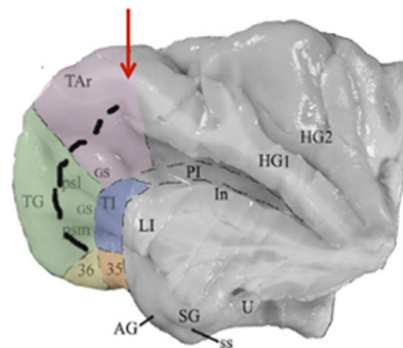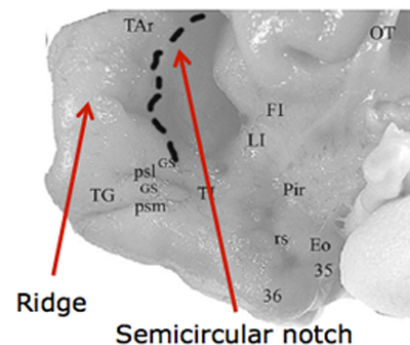

# C

## Orthogonal sections of the standard MNI152 T1-weighted template

The semicircular temporal notch is shown without labels in the top row;  
in the lower row, red arrows point to the notch

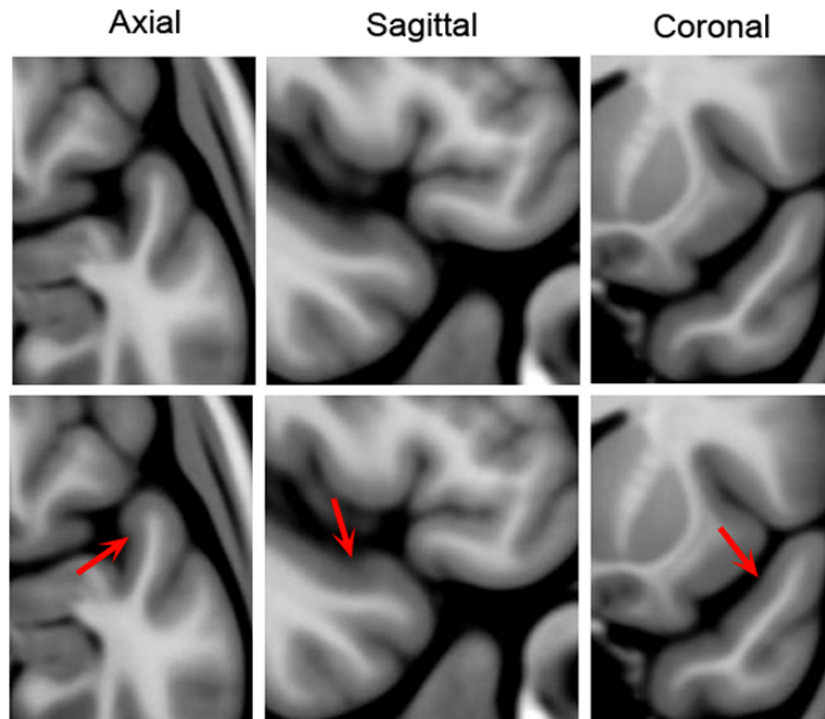

**Supplementary Figure S3.** Semicircular notch on the dorso-medial surface of the human TP. Location of the semicircular sulcus on orthogonal sections from the native MRI of three different healthy subjects (arrows).

# Semicircular Temporal Notch

Orthogonal sections of the native MRI from three different subjects

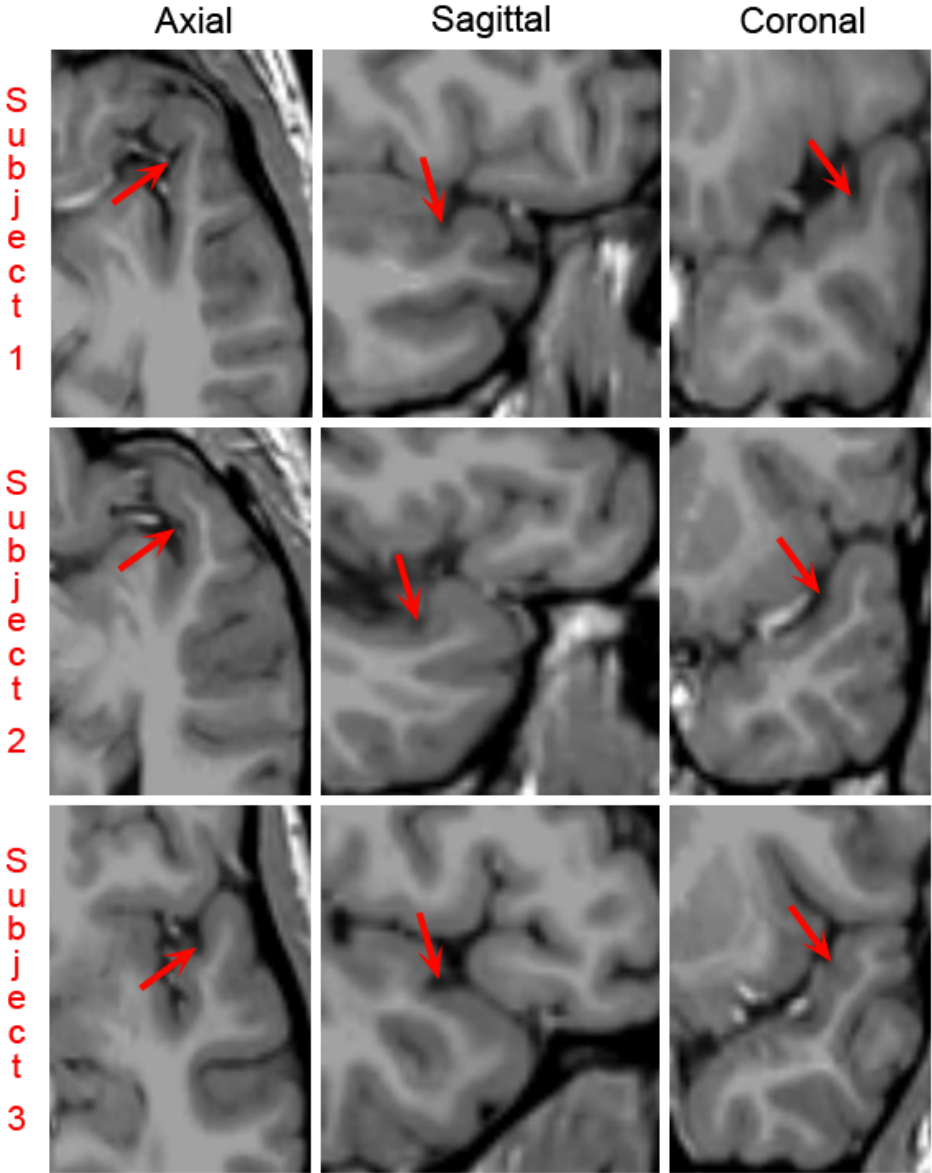

**Supplementary Figure S4.** Similarity matrix ( $\eta^2$  coefficients) for the RSFC for each seed from the two independent datasets, Dataset 1 in the x axis and Dataset 2 in the y axis. Note the high similarity between identical seeds in the two samples (central diagonal of the matrix).

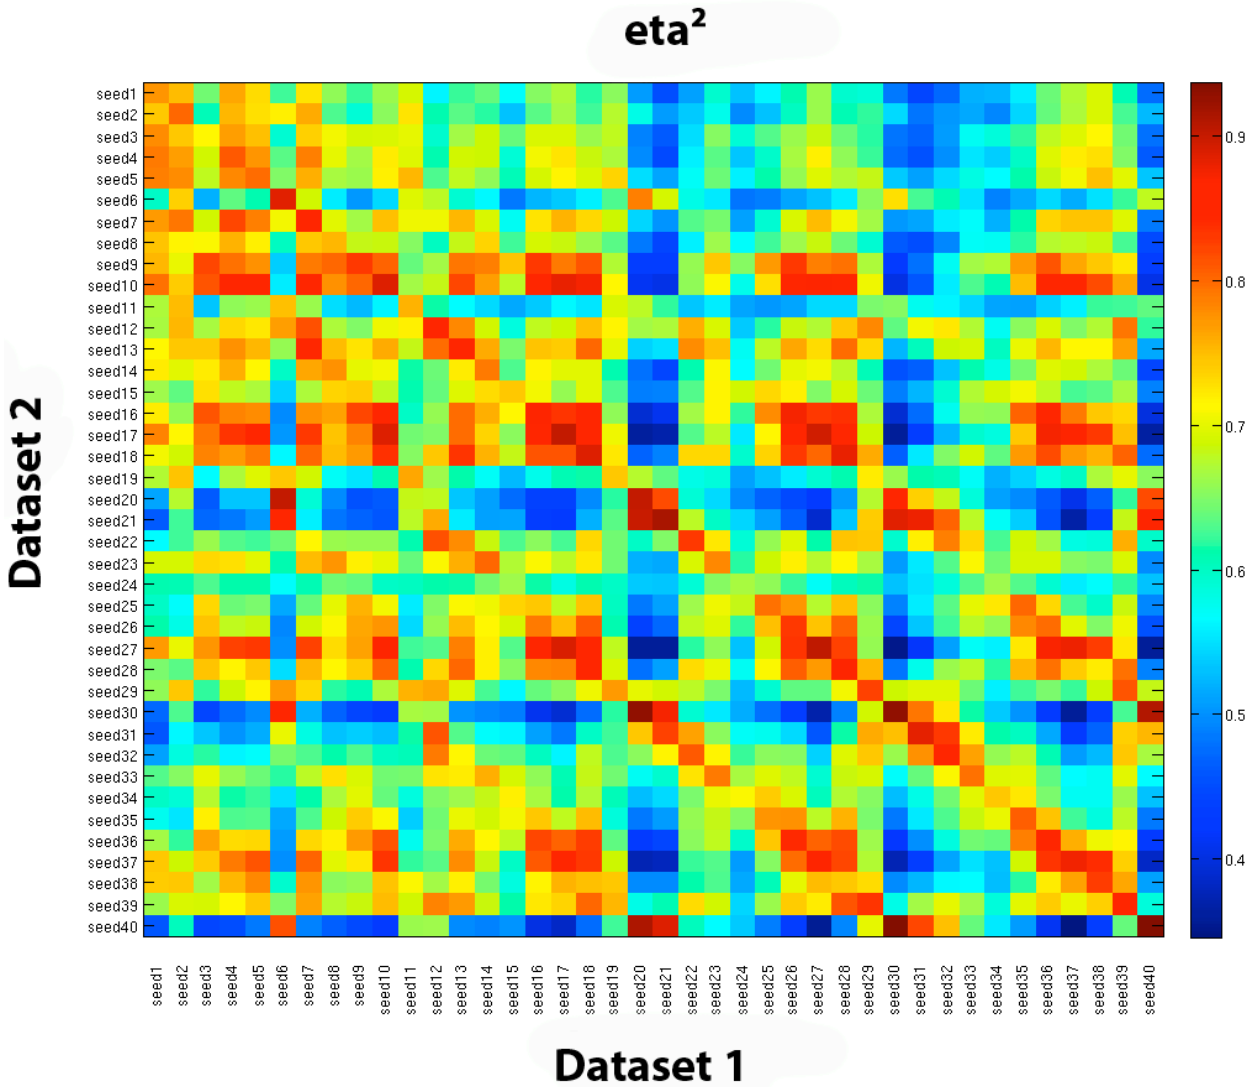

**Supplementary Figure S5.** RSFC maps for each of the 40 seeds in the left TP. Voxel Z score, > 0.4. The first map indicates laterality and z coordinates for each of the axial slices of the standard MNI152 template.

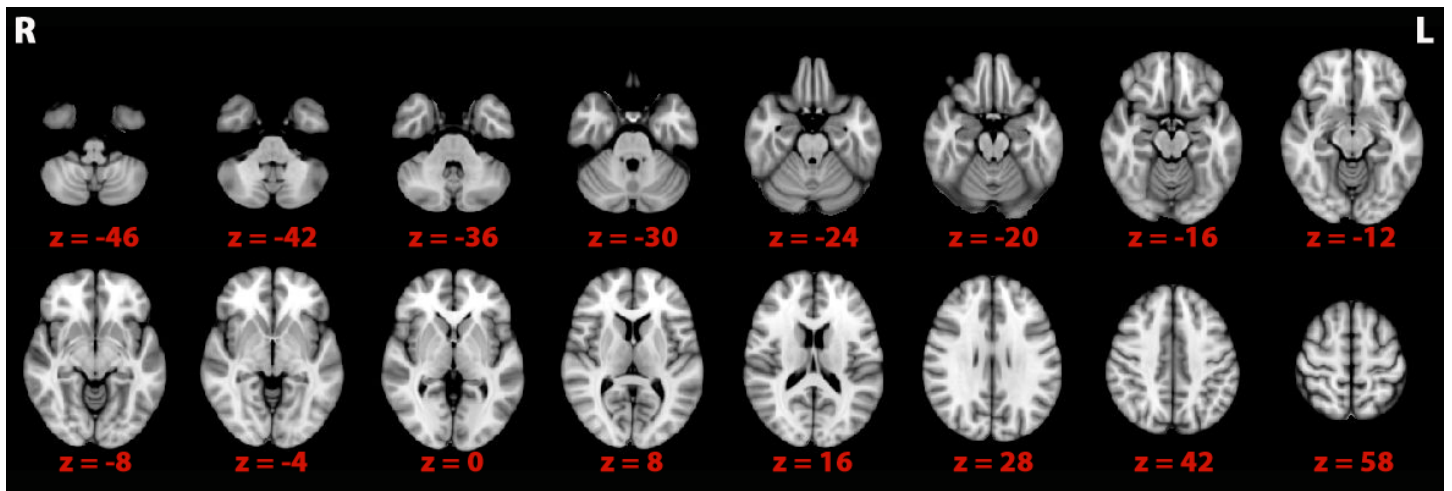

**Seed 1**

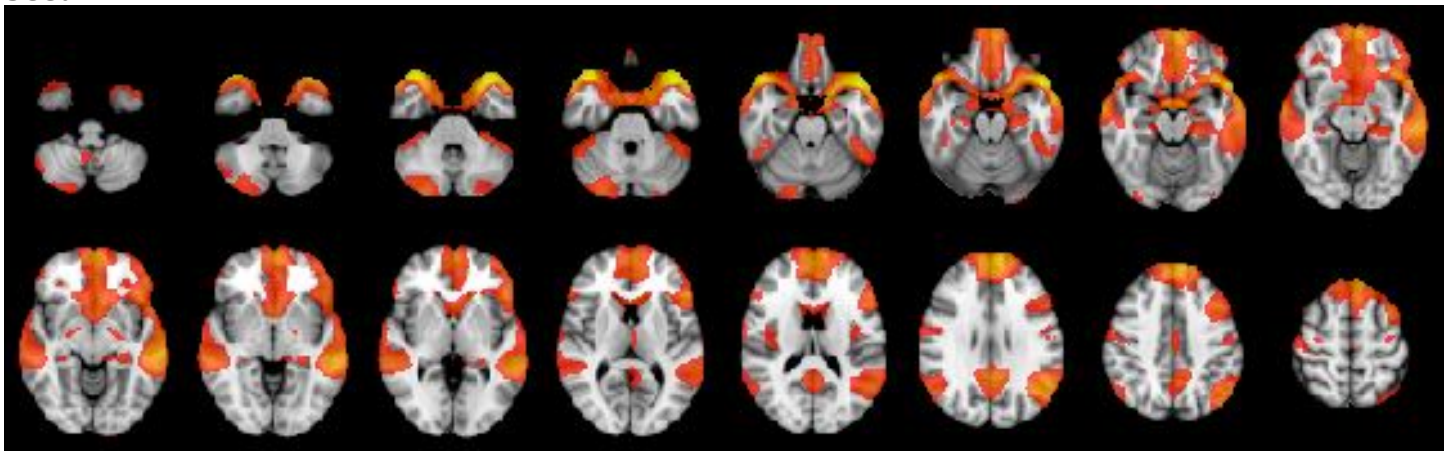

**Seed 2**

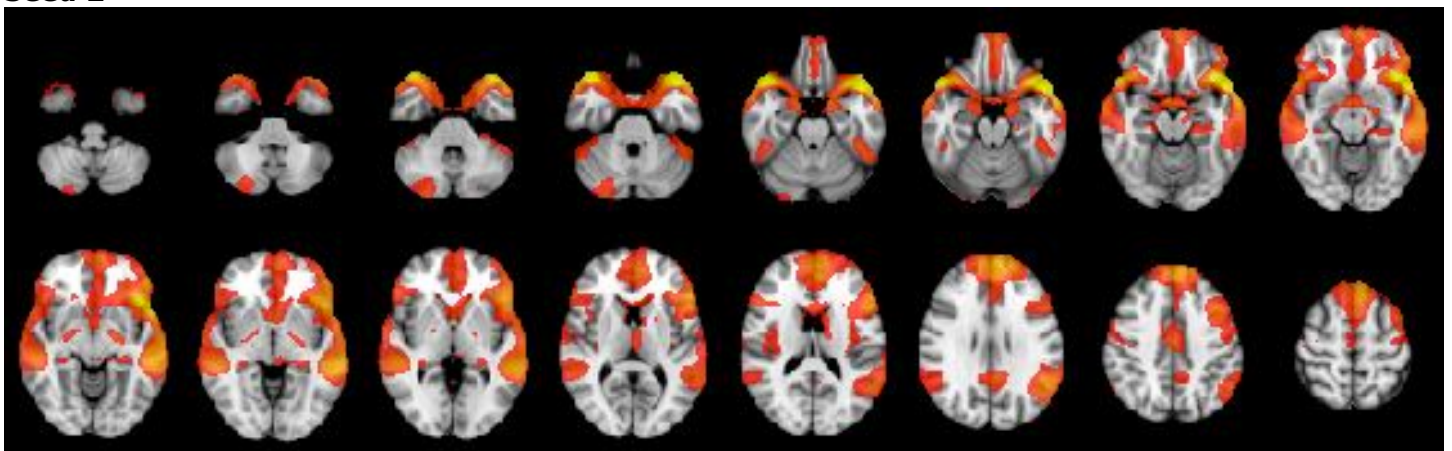



Seed 3

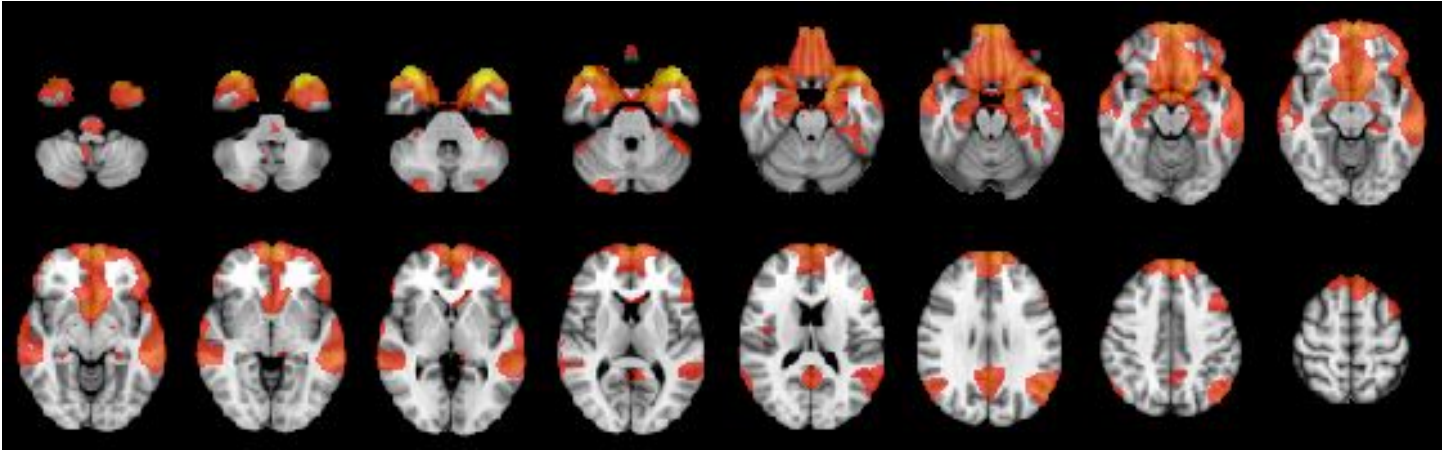

Seed 4

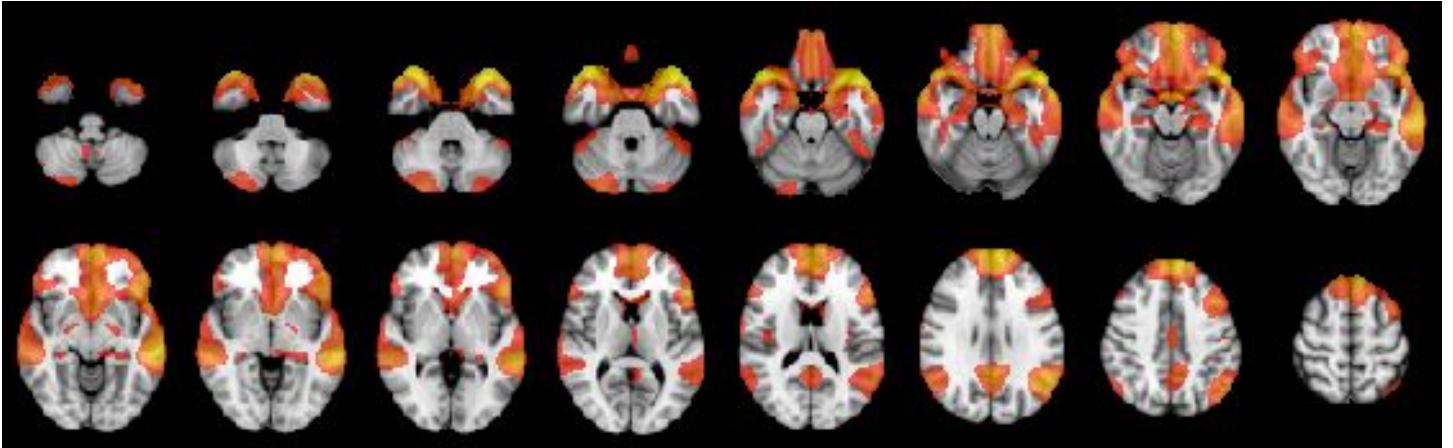

Seed 5

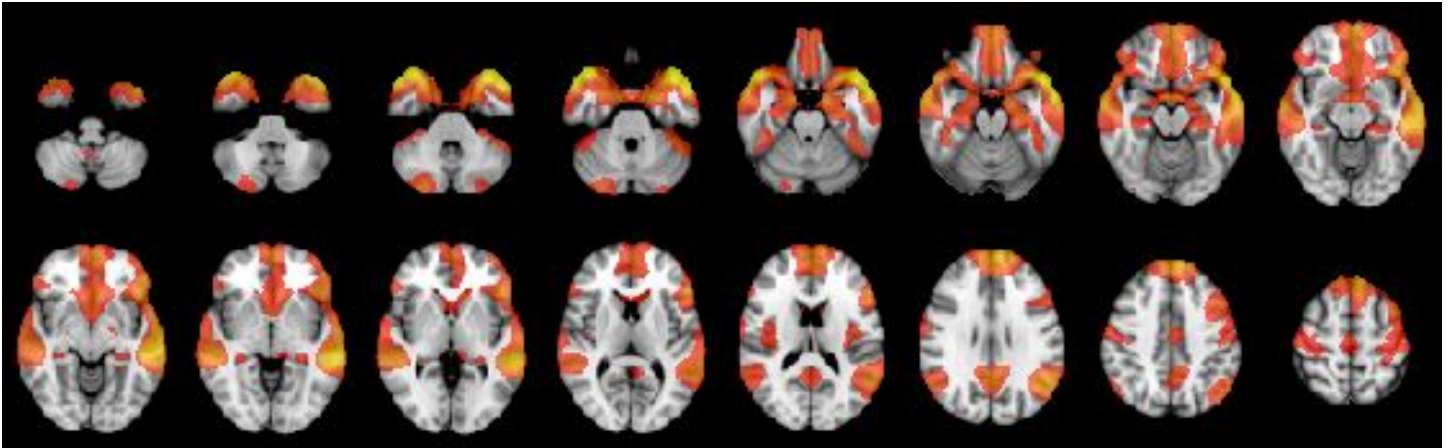

Seed 6

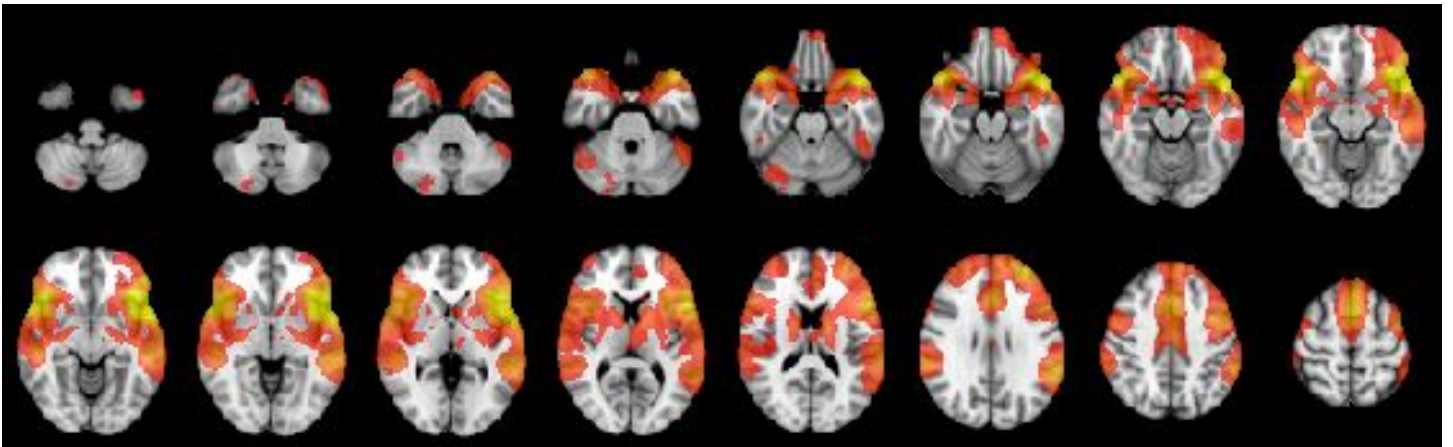

Seed 7

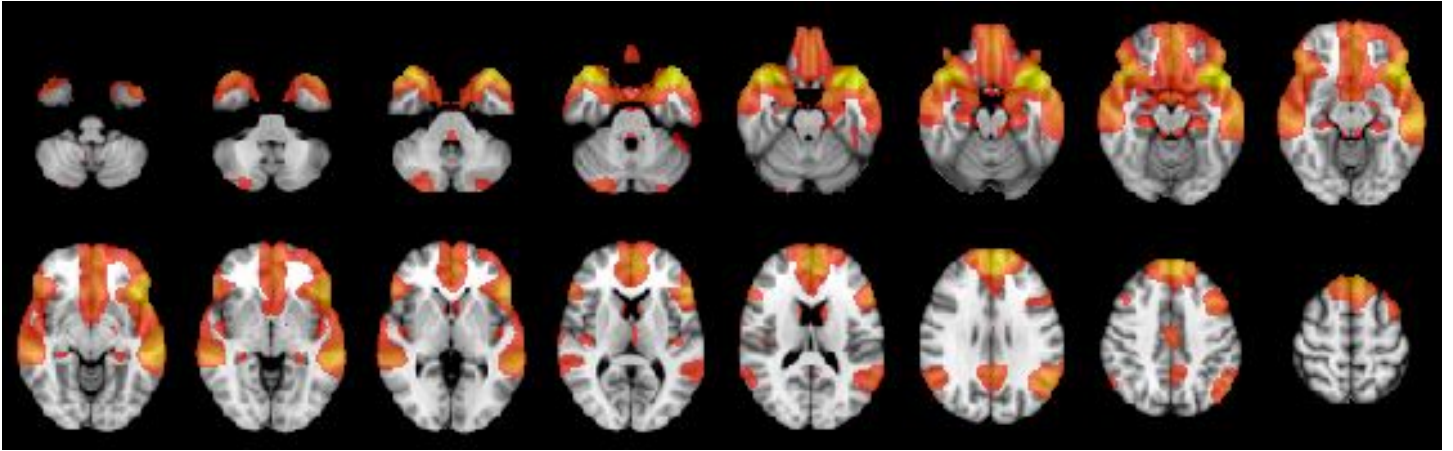

Seed 8

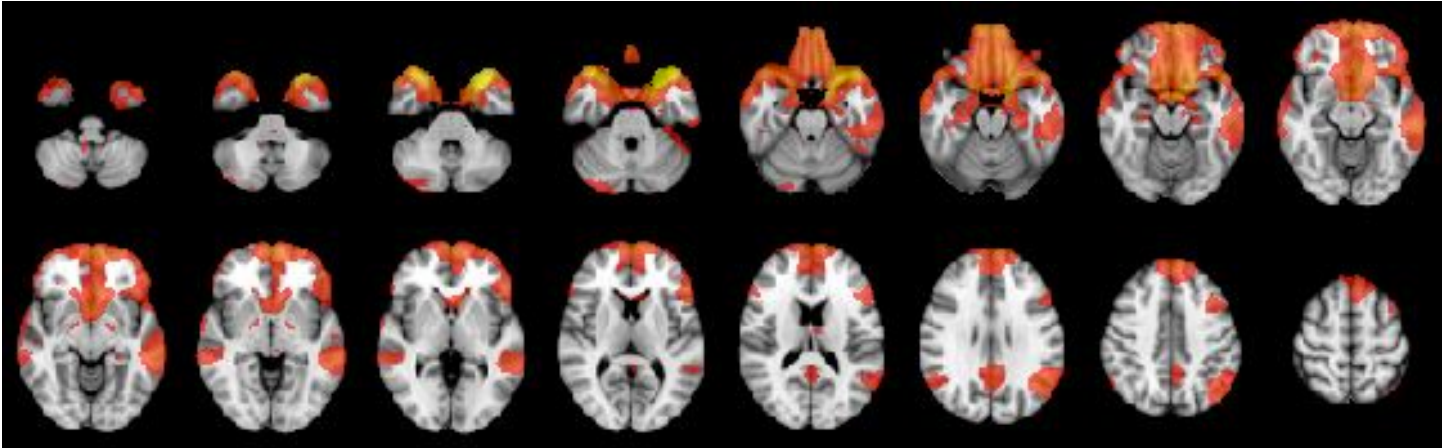

Seed 9

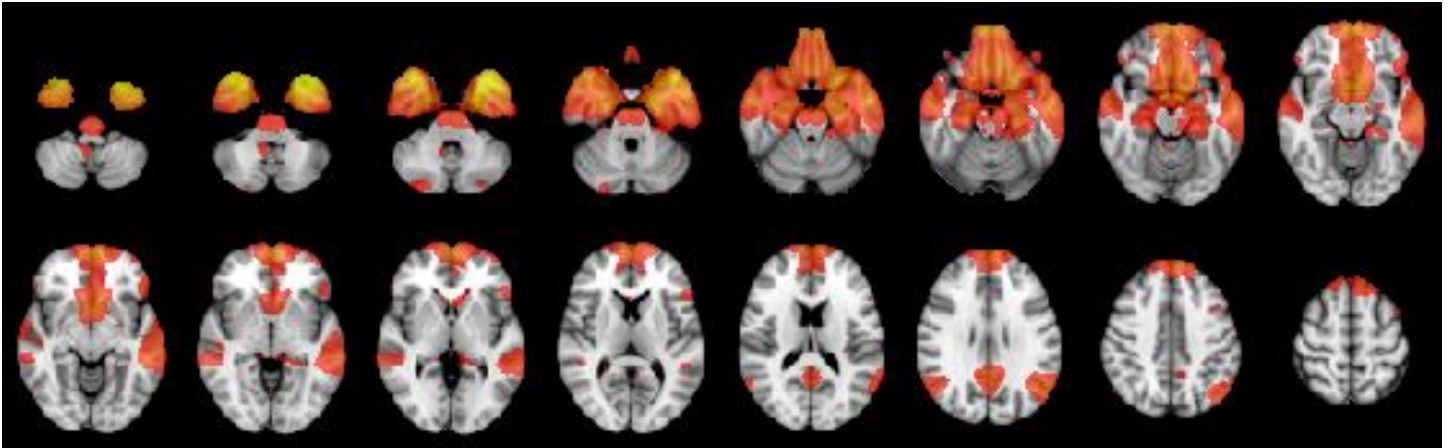

Seed 10

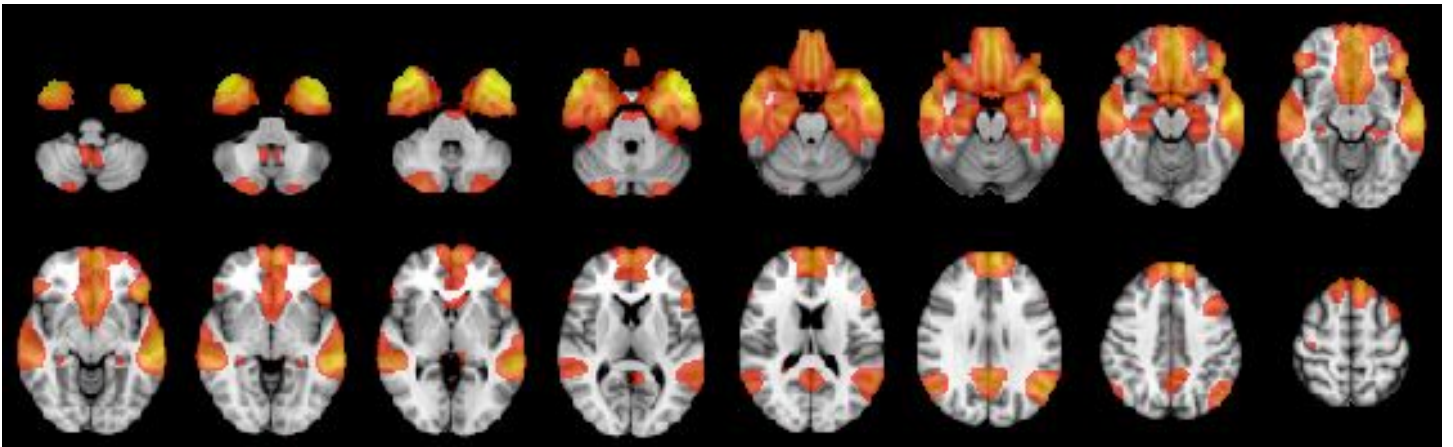

**Seed 11**

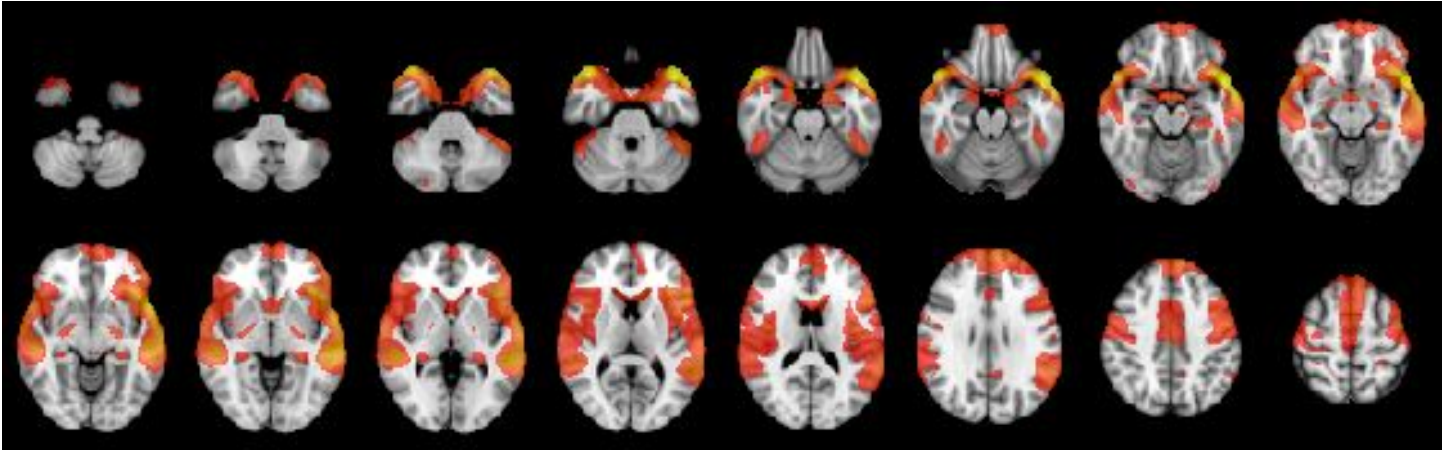

**Seed 12**

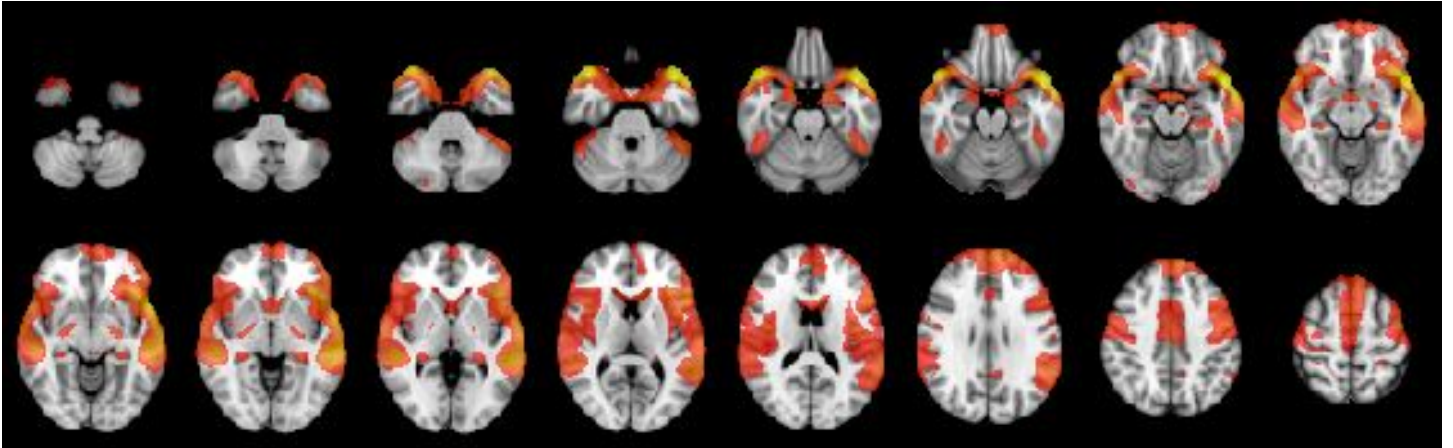

**Seed 13**

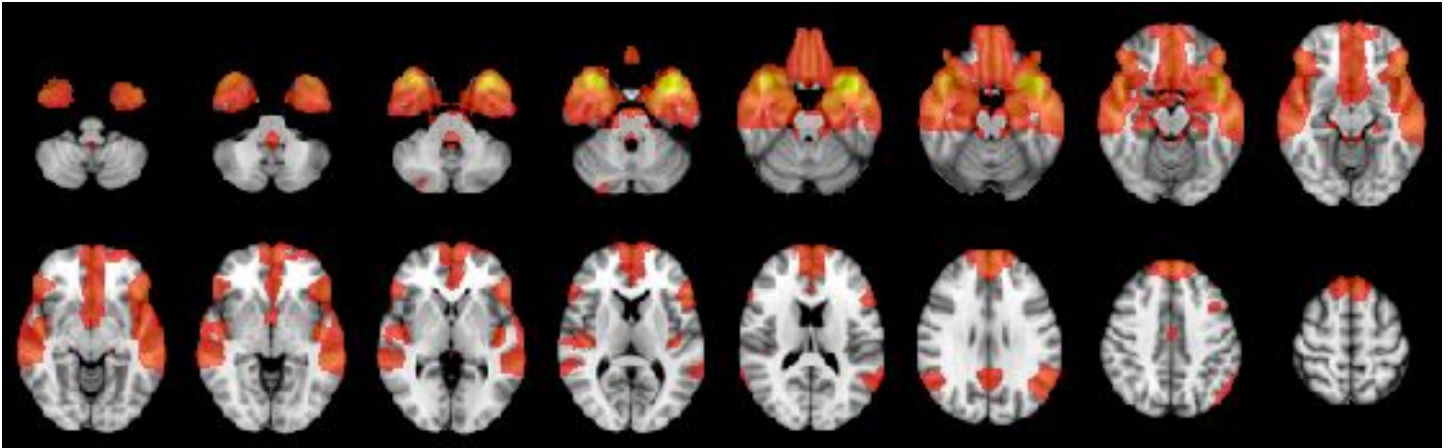

**Seed 14**

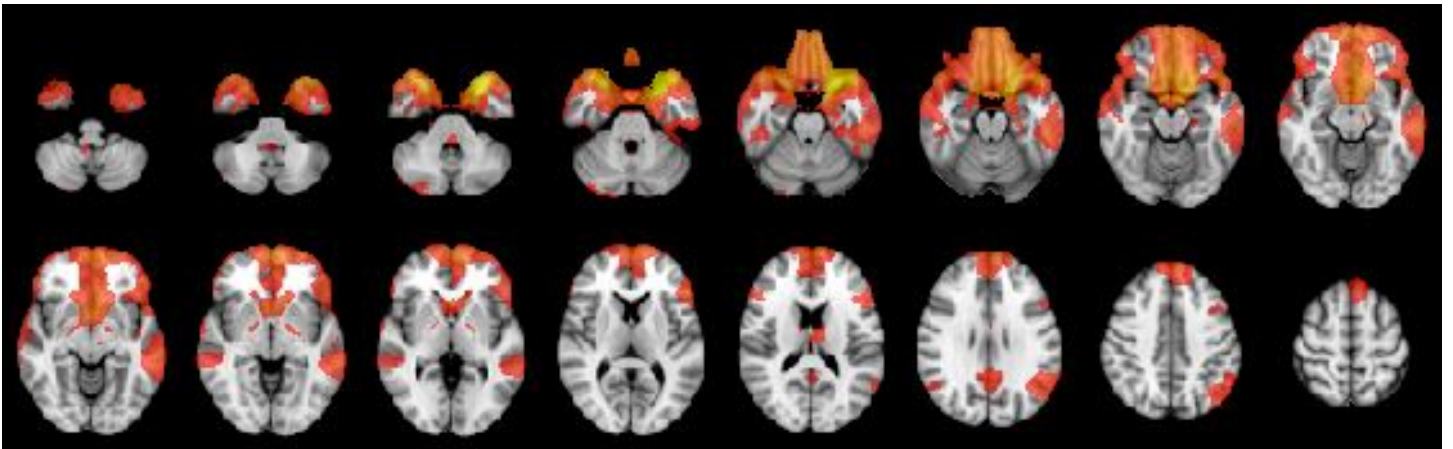

**Seed 15**

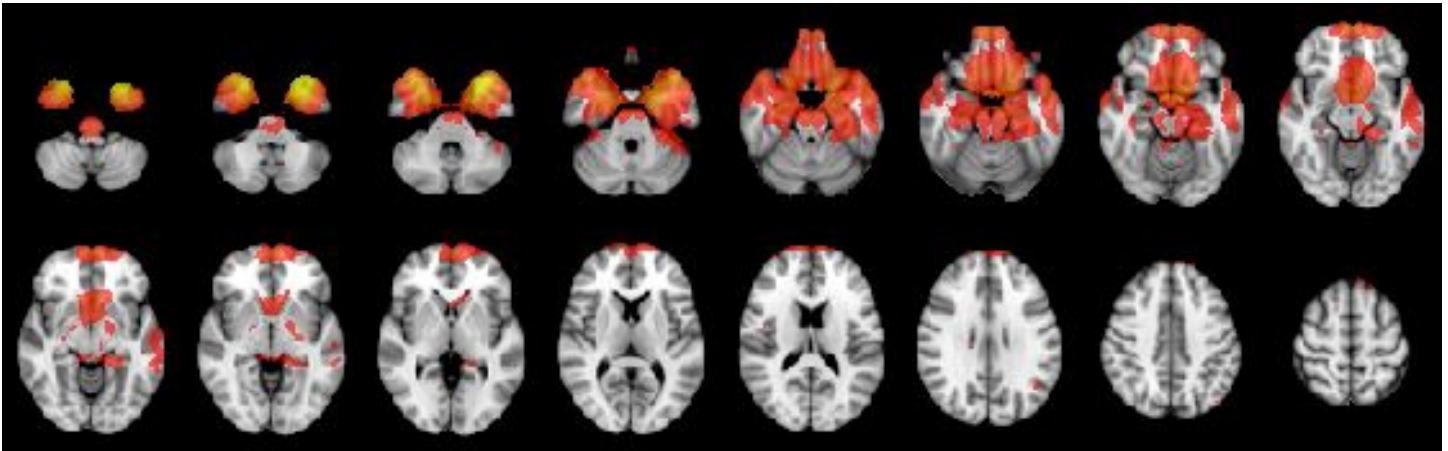

**Seed 16**

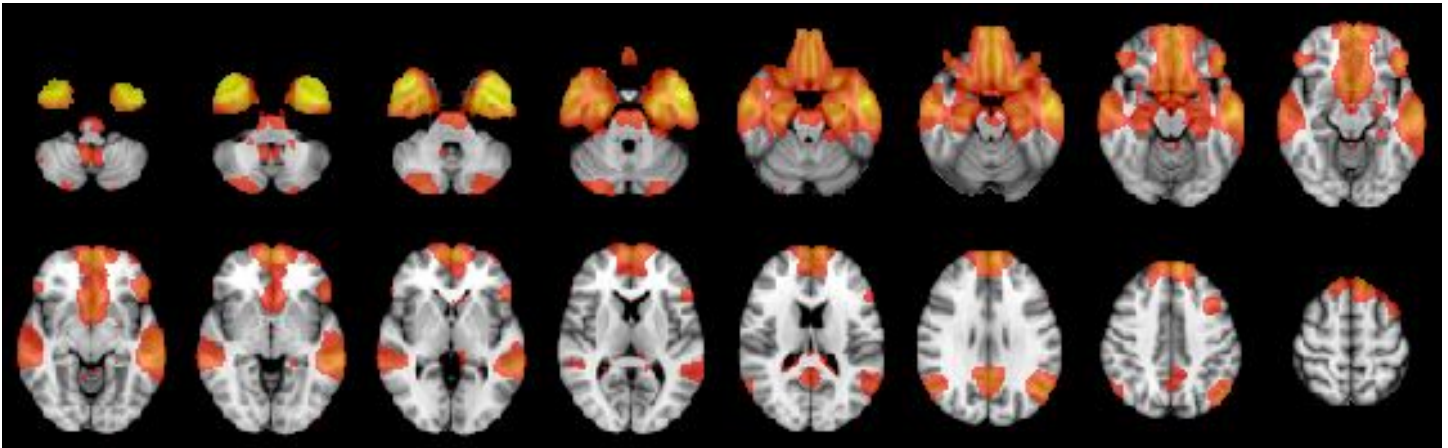

**Seed 17**

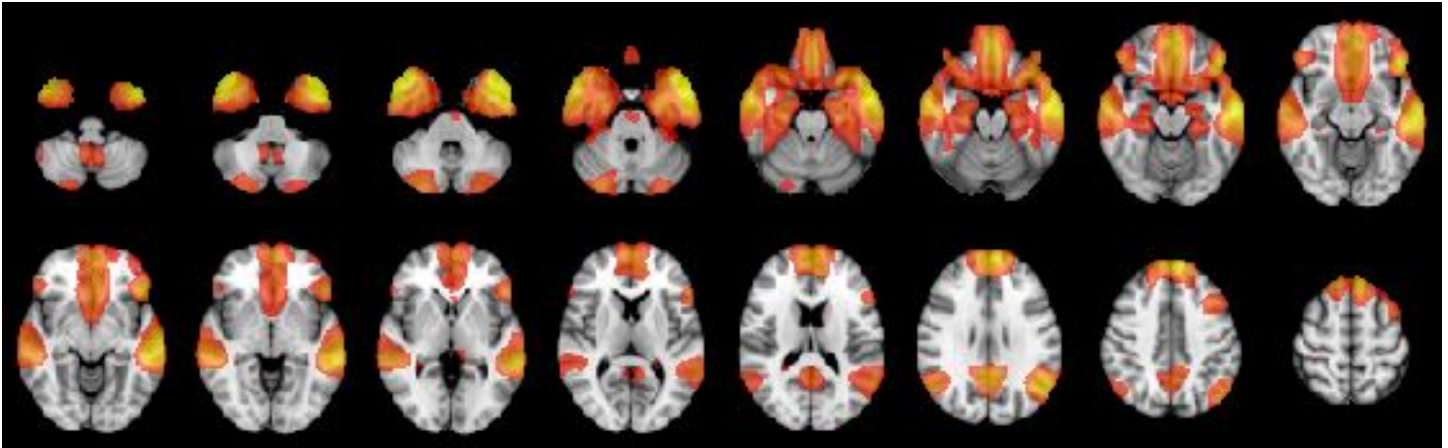

**Seed 18**

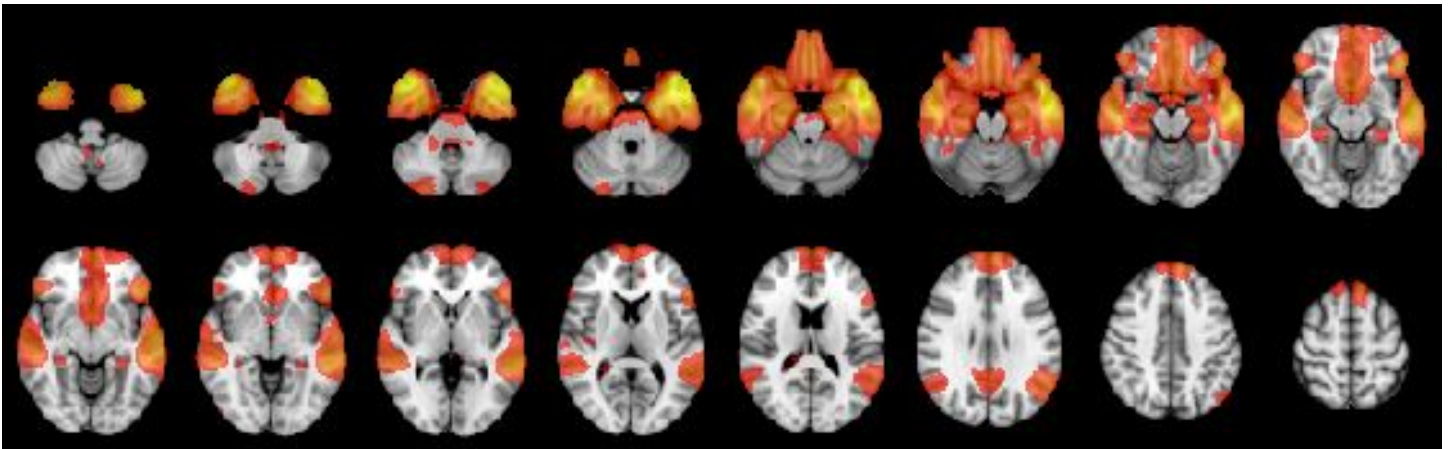

Seed 19

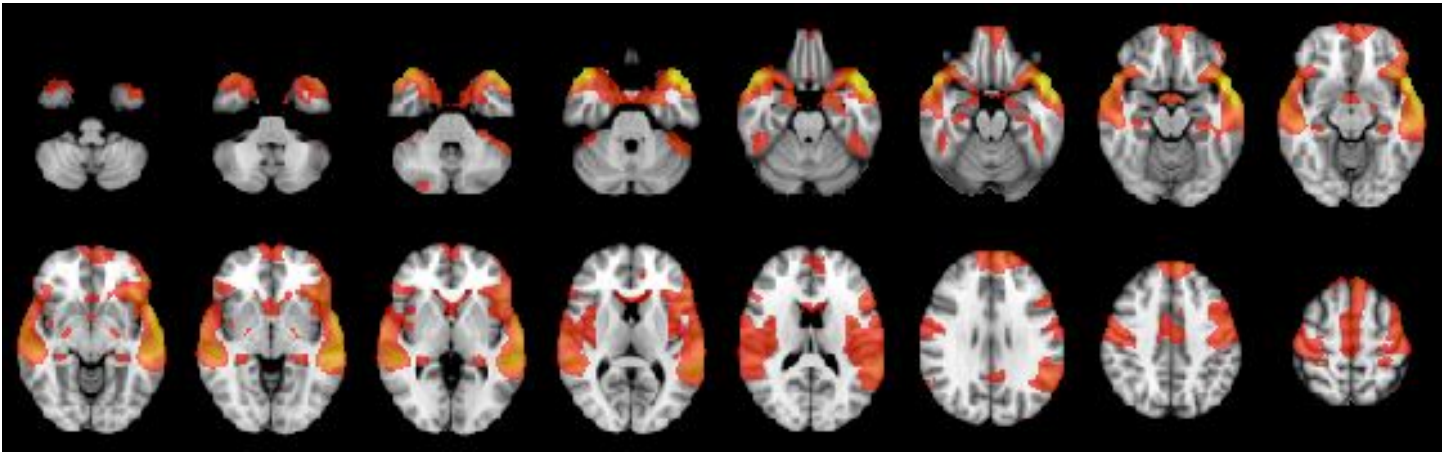

Seed 20

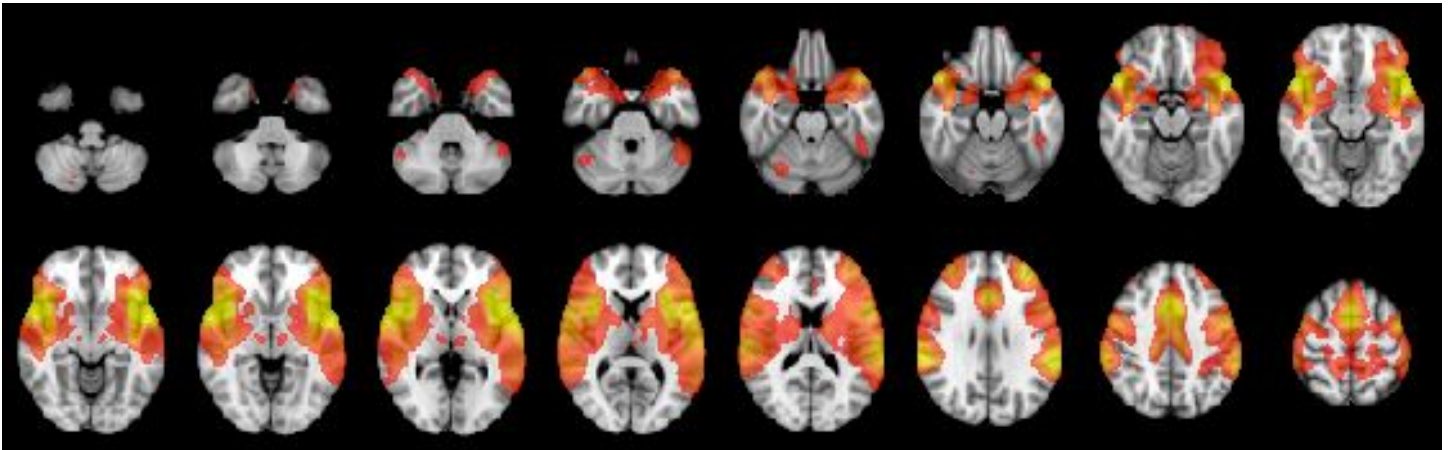

Seed 21

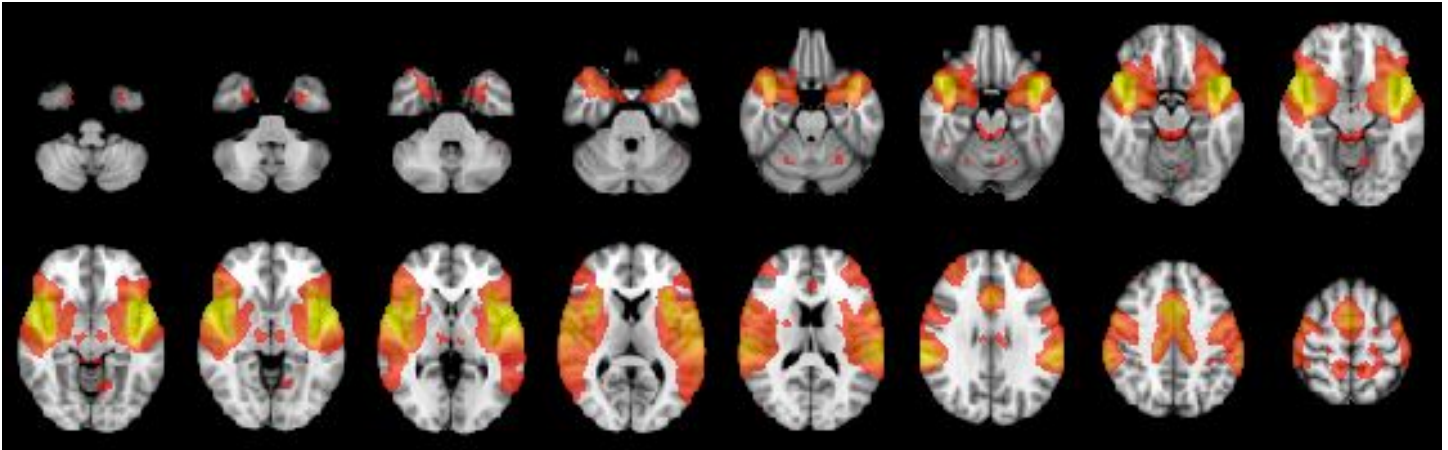

Seed 22

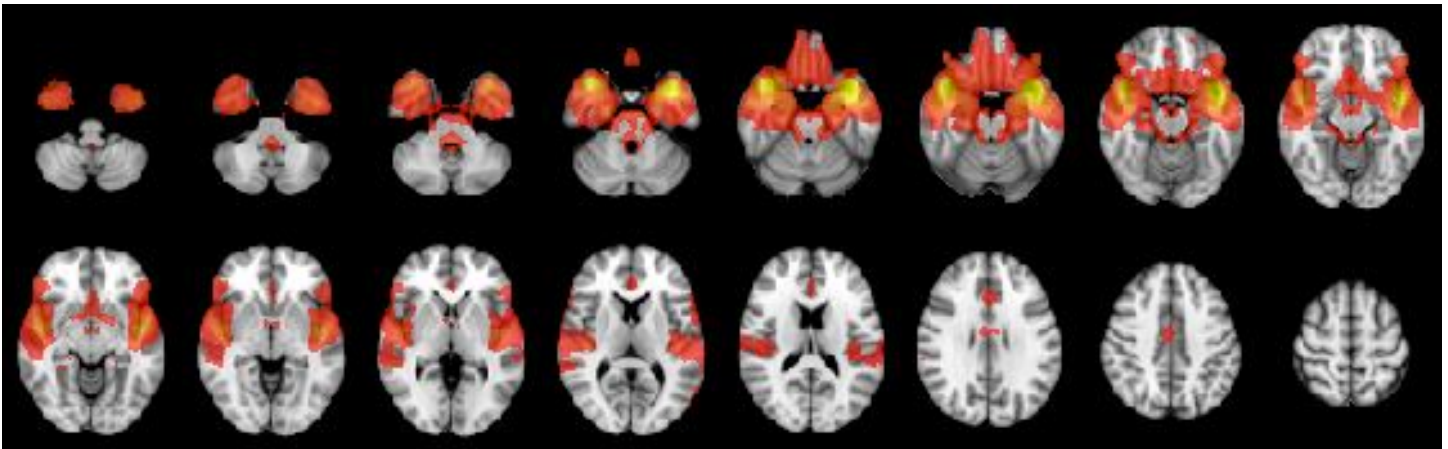

**Seed 23**

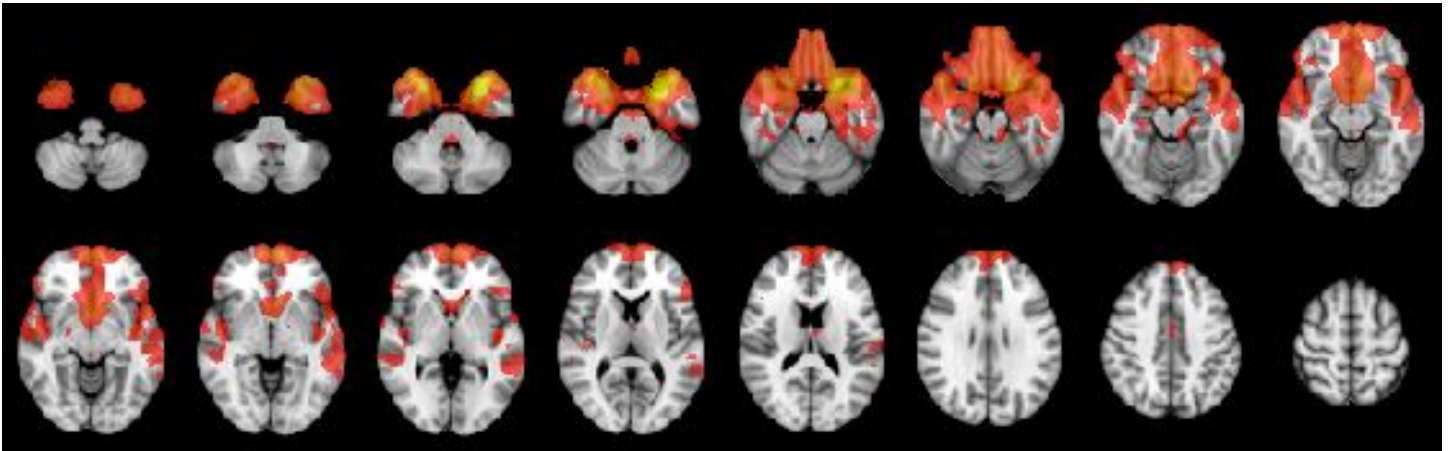

**Seed 24**

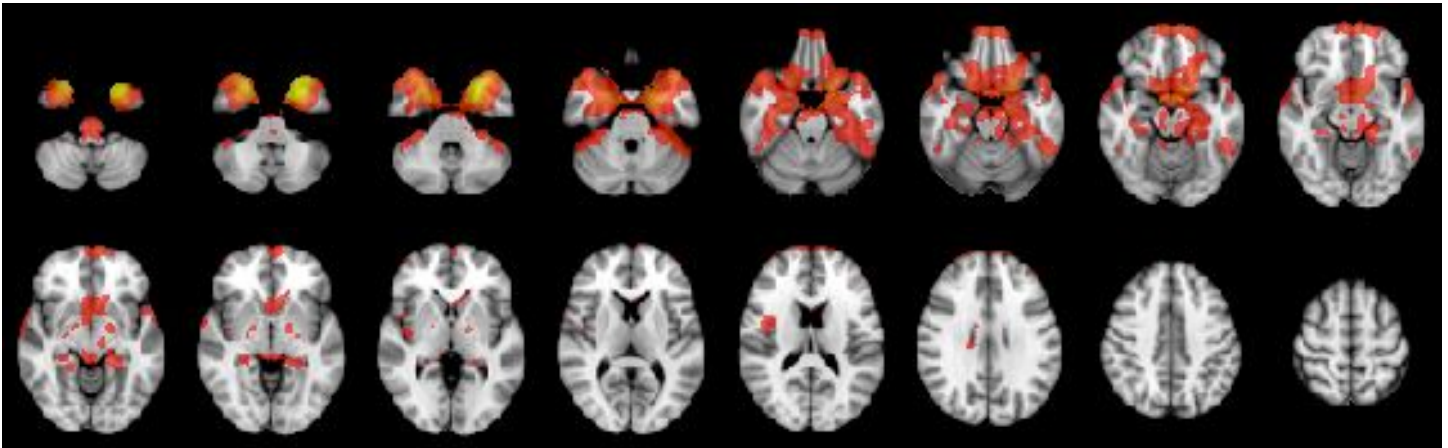

**Seed 25**

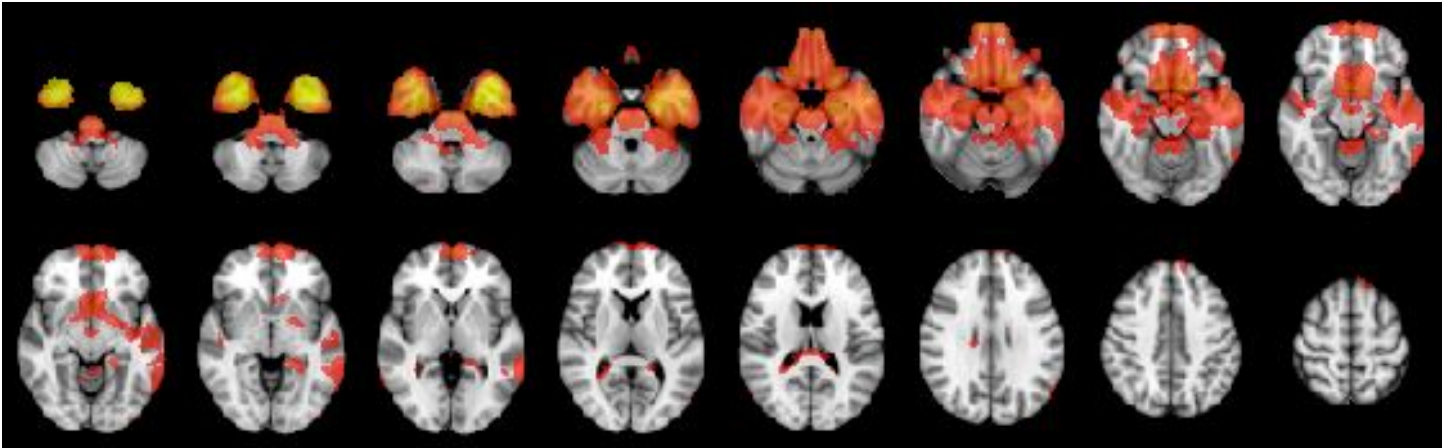

**Seed 26**

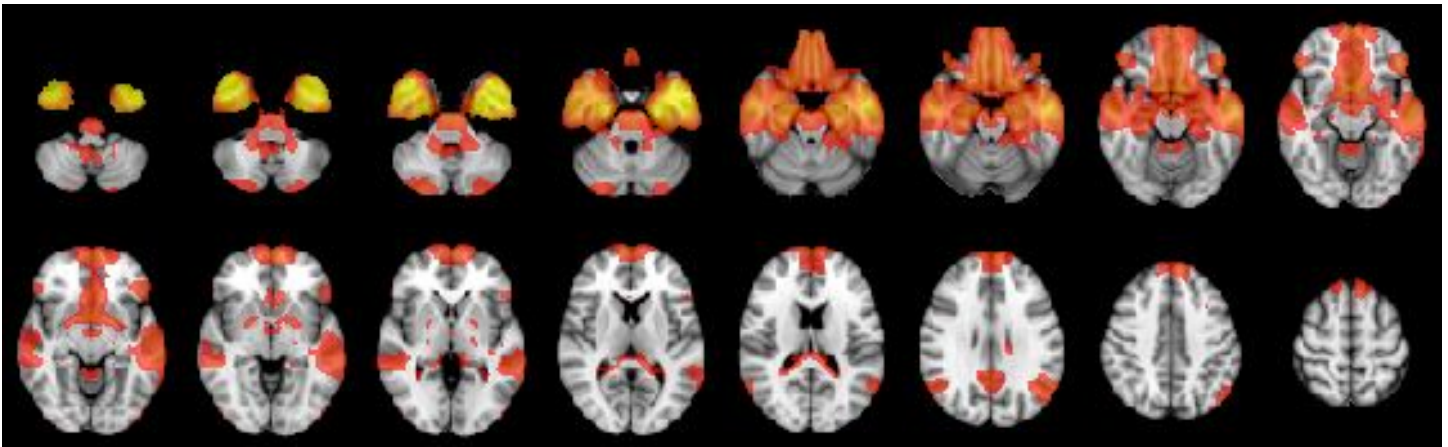

Seed 27

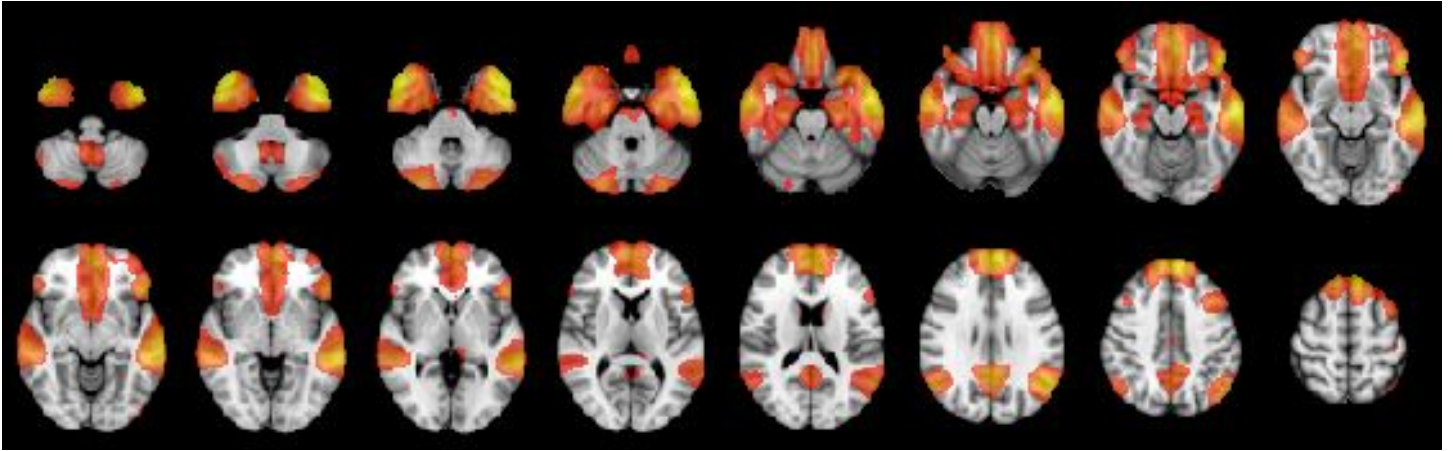

Seed 28

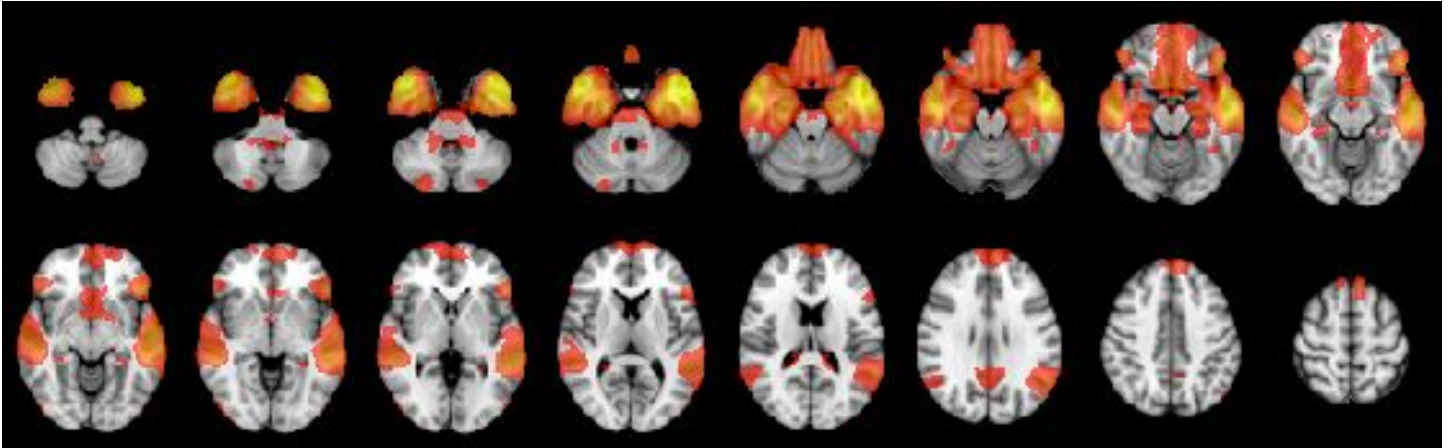

Seed 29

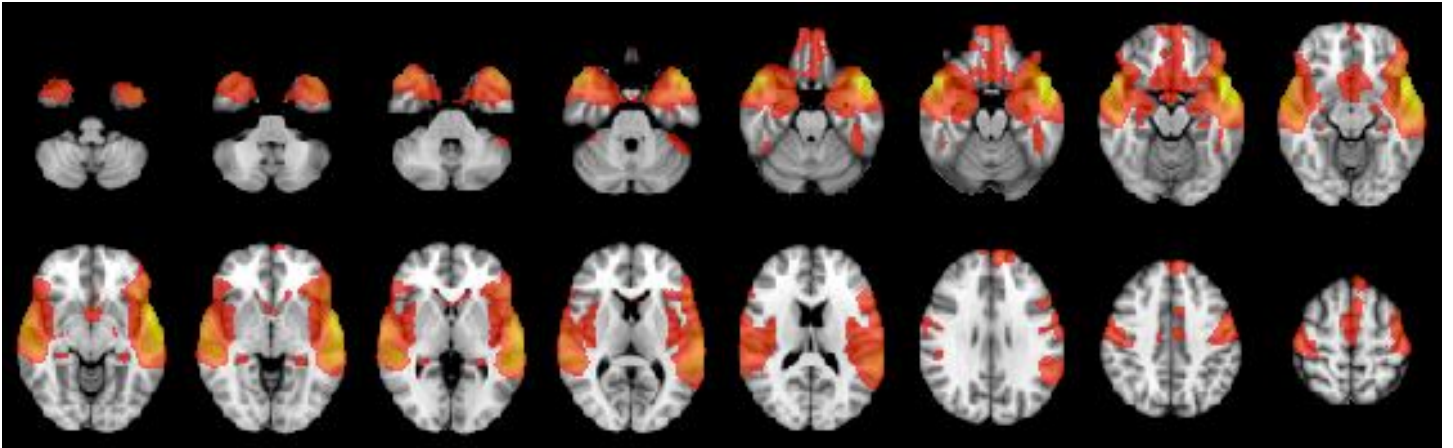

Seed 30

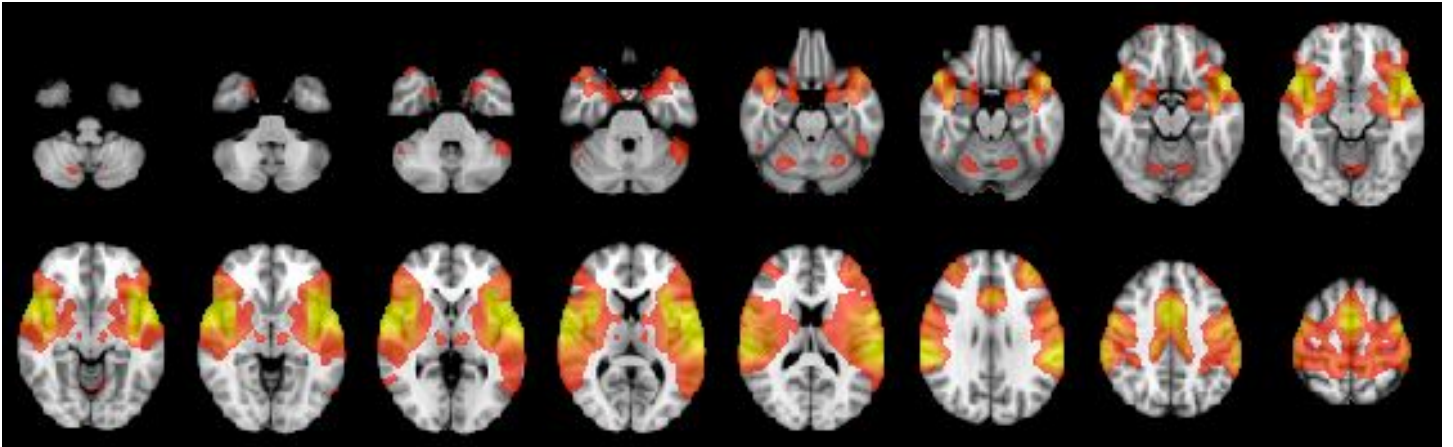

**Seed 31**

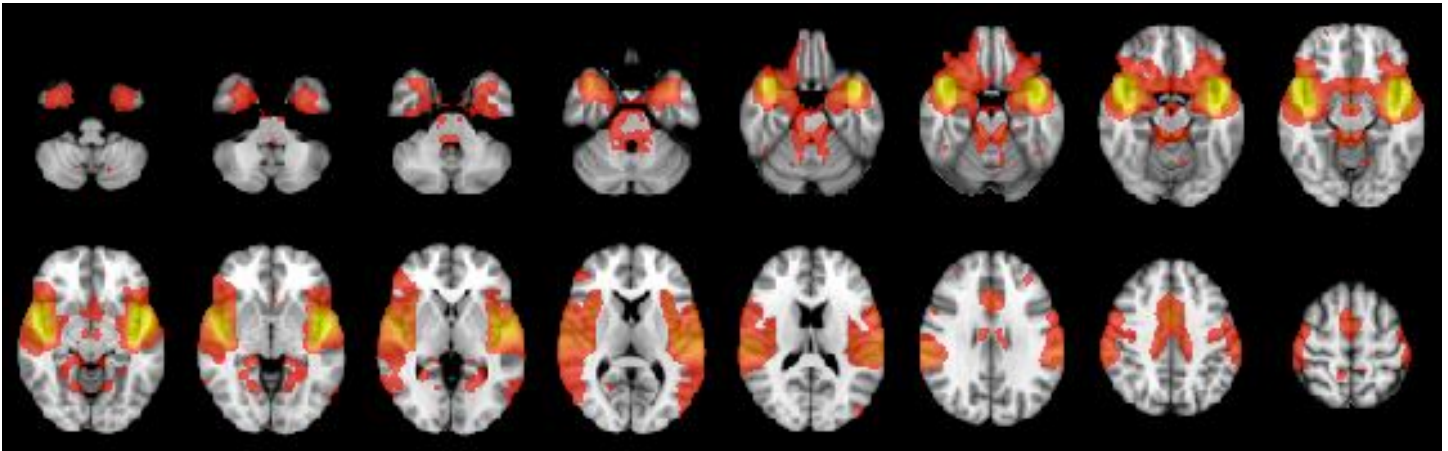

**Seed 32**

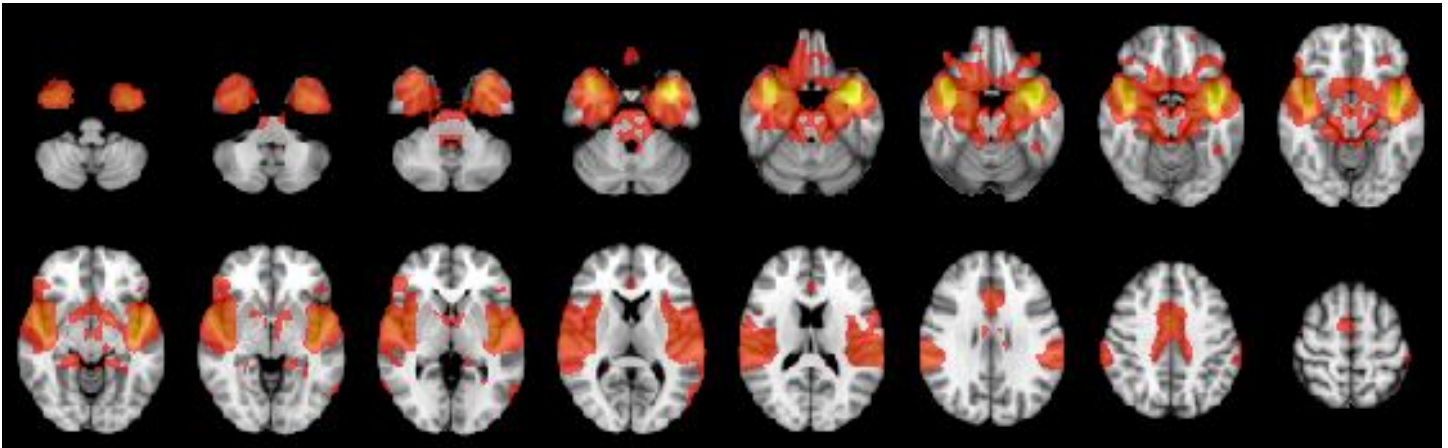

**Seed 33**

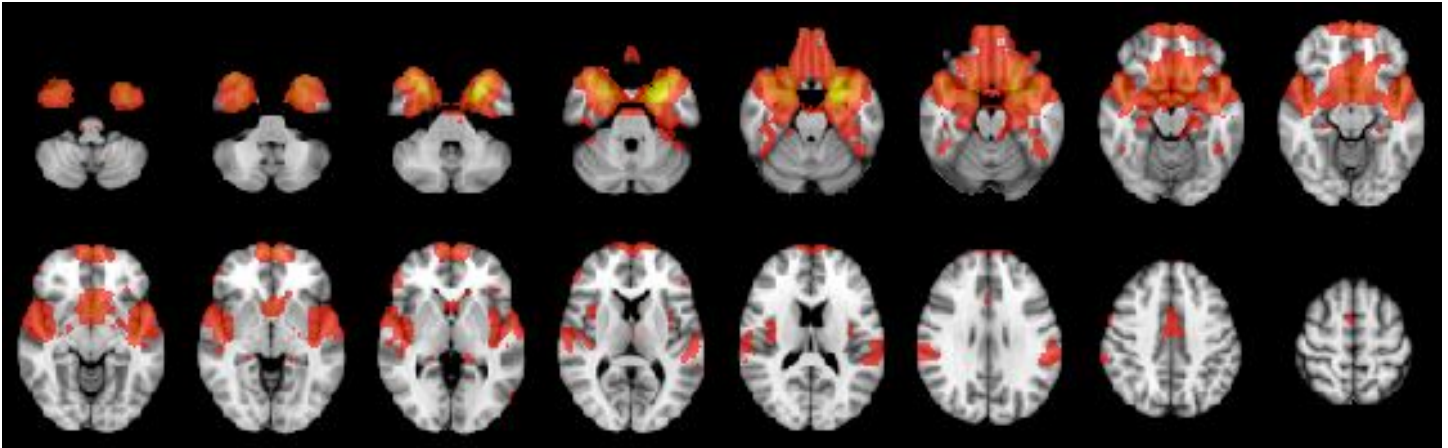

**Seed 34**

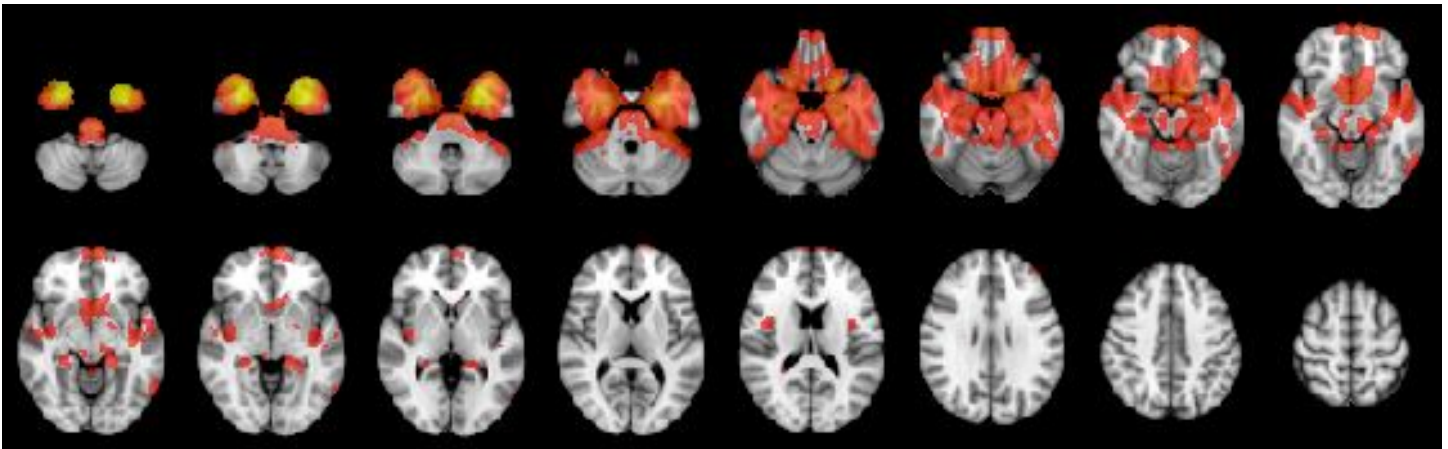



**Seed 35**

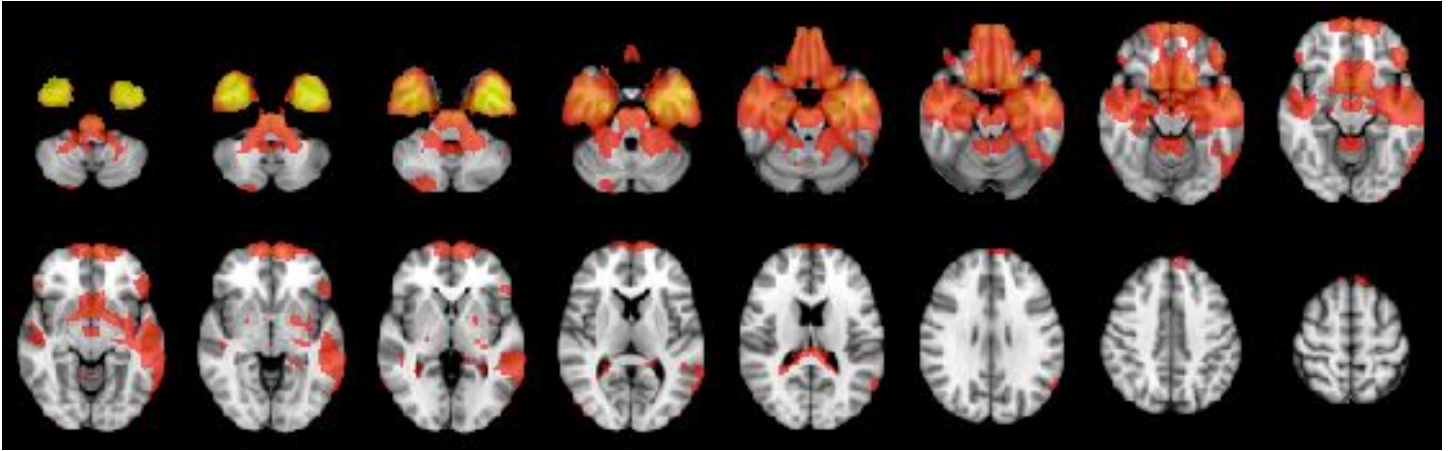

**Seed 36**

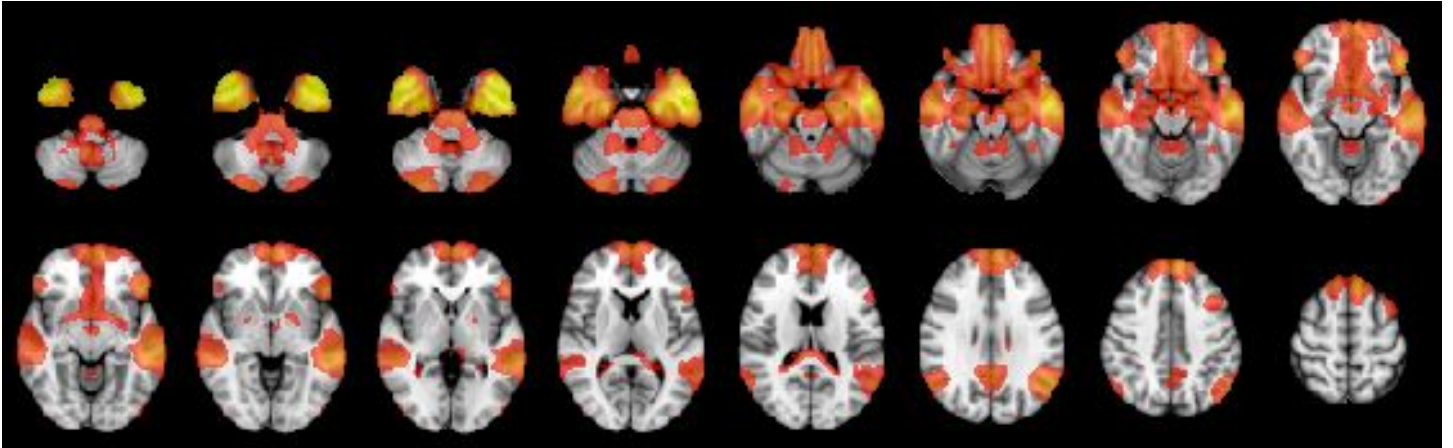

**Seed 37**

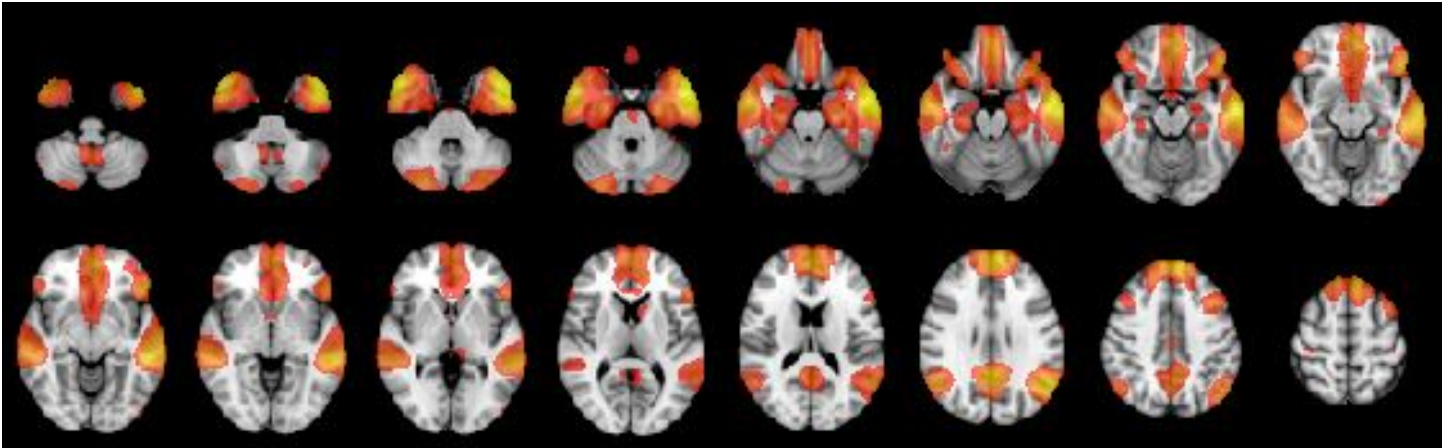

**Seed 38**

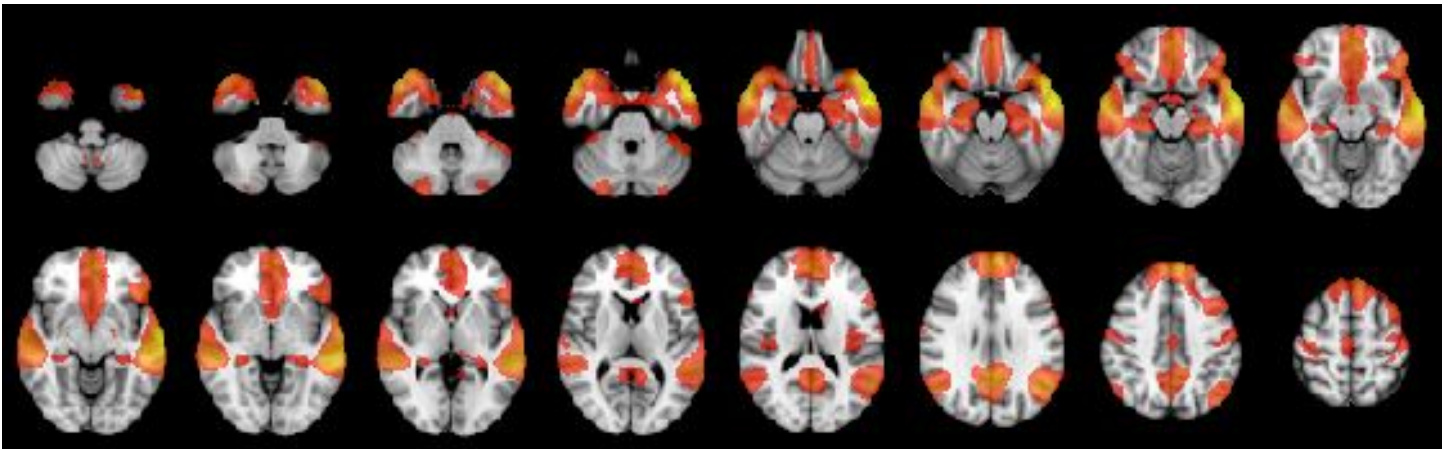

Seed 39

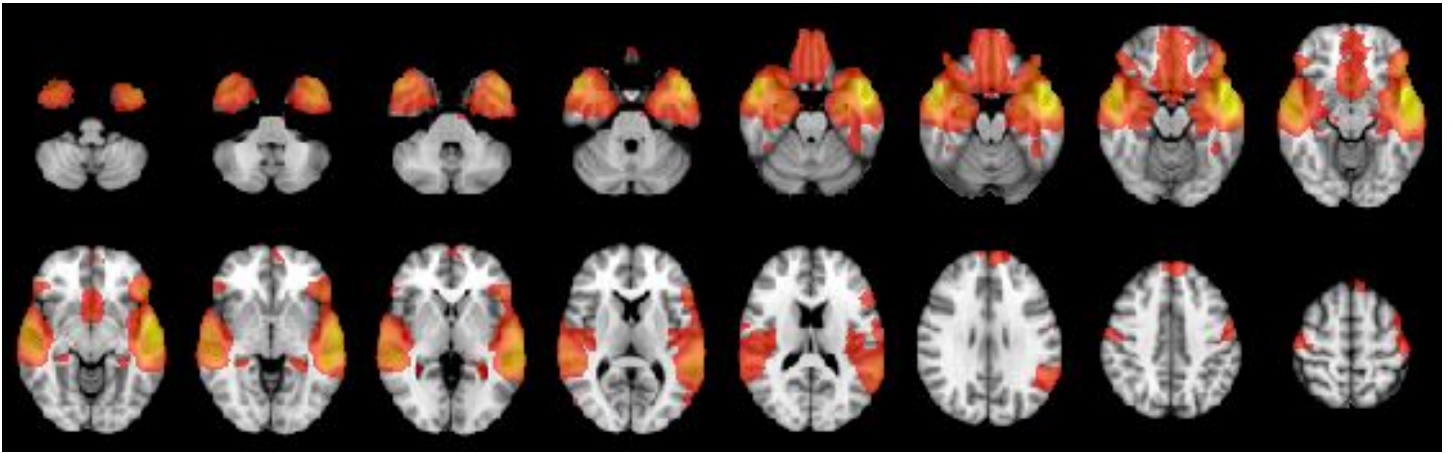

Seed 40

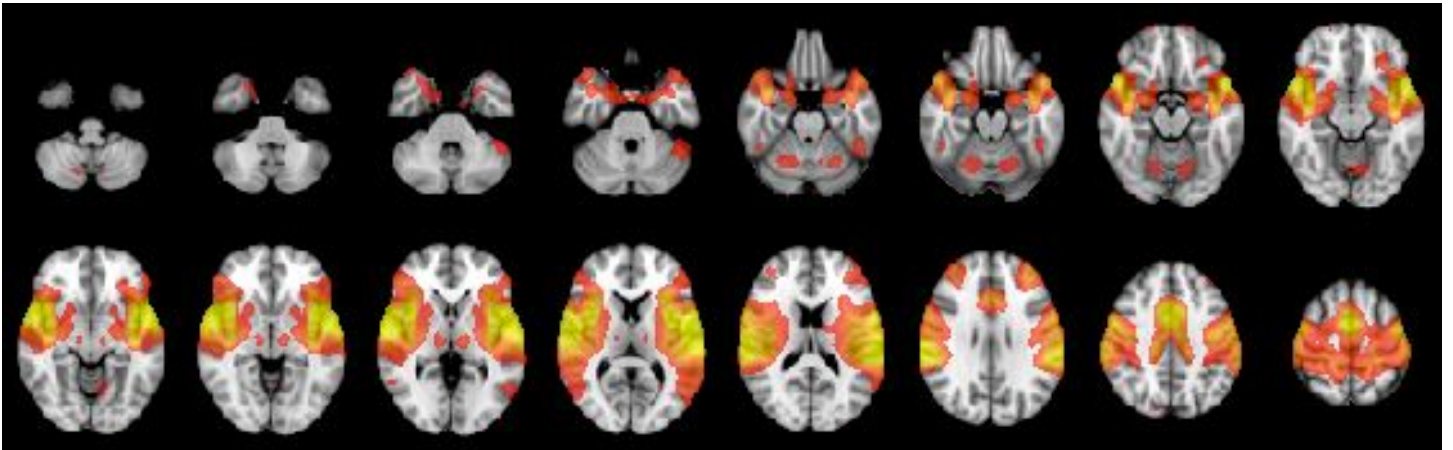

**Supplementary Figure S6.** Coronal section showing connectivity of seed 22 with the region of the bed nucleus of the stria terminalis.

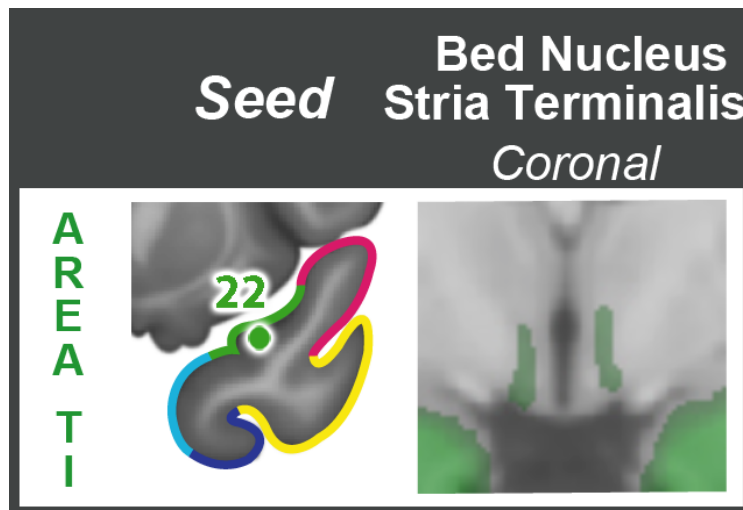

Supplement: supp_bht260_bht260supp.pdf [file supp_bht260_bht260supp.pdf]
